# Supplementary material
Source: Springer Nature journal article supplement (https://www.springermedizin.de/resource/supplementary/13012_2013_707_MOESM4_ESM.pdf/9630288)

**Percentage of first prescriptions for anti-depressants**

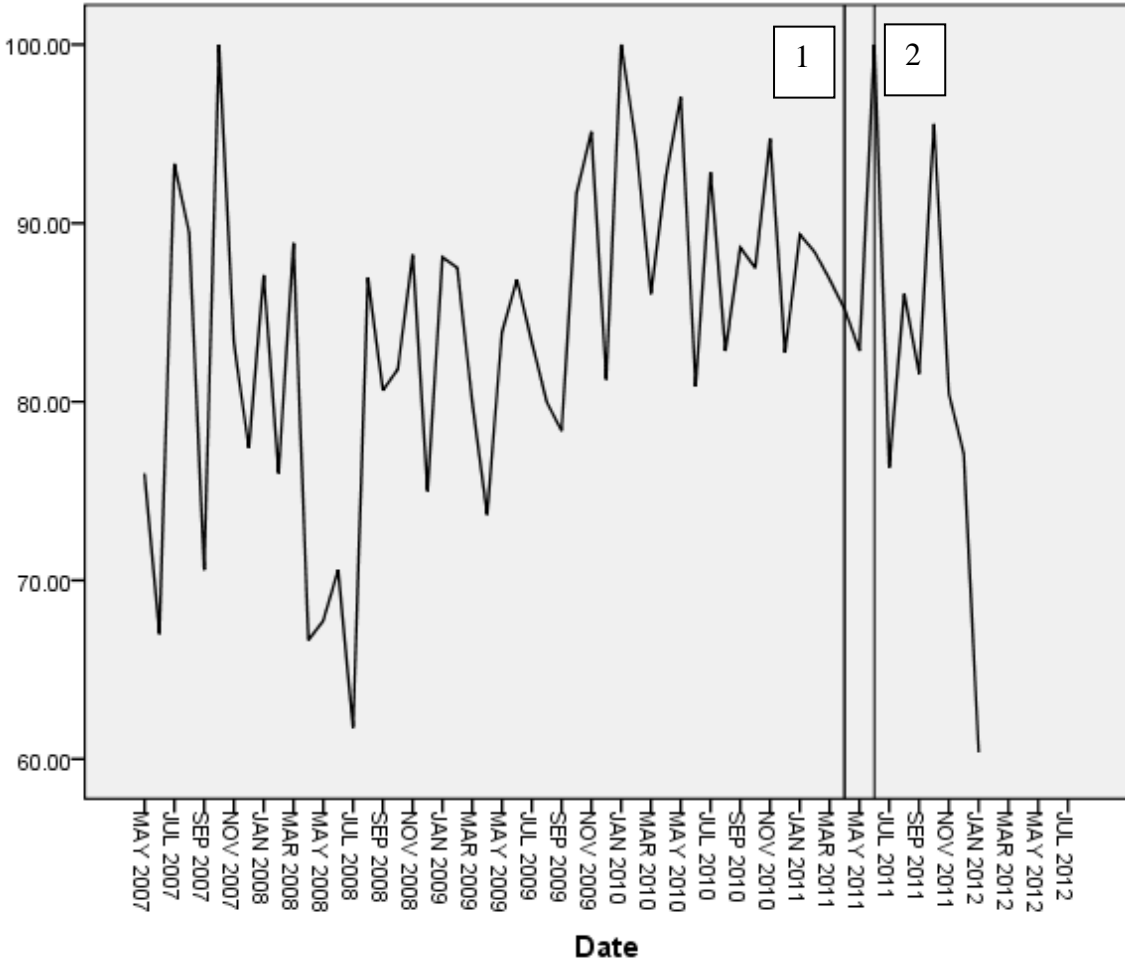

Supplement: MOESM4 [file 9630288]
